# Supplementary material
Source: publisher figshare collection journal article supplement (https://acs.figshare.com/ndownloader/files/5108161)

# Palladium-Catalyzed Annulation of Arynes by 2-Halobenzaldehydes: Synthesis of Fluoren-9-ones

Xiaoxia Zhang and Richard C. Larock\*

*Department of Chemistry, Iowa State University, Ames, Iowa 50011*

## Supporting Information

**General.** The  $^1\text{H}$  and  $^{13}\text{C}$  NMR spectra were recorded at 300 and 75.5 MHz or 400 and 100 MHz respectively. All melting points are uncorrected. High resolution mass spectra were recorded on a Kratos MS50TC double focusing magnetic sector mass spectrometer using EI at 70 eV. All reagents were used directly as obtained commercially unless otherwise noted.

**Synthesis of Starting Materials.** Compounds **1**, **2**, **4** and **11** were purchased from Sigma-Aldrich Co. Compounds **5**,<sup>1</sup> **14**,<sup>2</sup> **17**<sup>3</sup> and **19**<sup>4</sup> were prepared according to literature procedures.

Compounds **7**, **9** and **12** were prepared from the respective commercially available 2-bromobenzaldehydes by the previously reported three-step procedure shown below.<sup>5</sup> Compound **7** was obtained as a light yellow solid in a 75% overall yield.

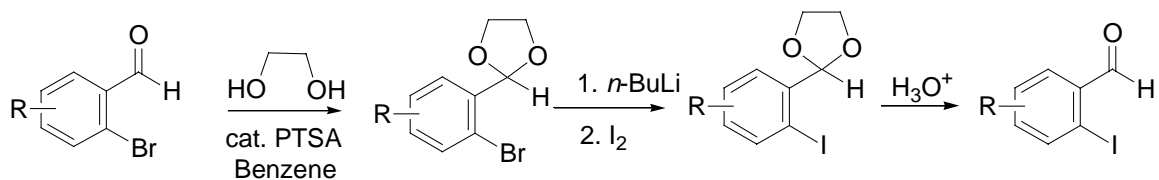

The spectral properties were identical with those previously reported.<sup>5</sup> Compound **9** was obtained as a white solid in an 80% overall yield. The spectral properties were identical with those previously reported.<sup>6</sup>

**1-Iodo-2-naphthalenecarboxaldehyde (12).** Compound **12** was obtained as a light yellow solid in a 60% overall yield: mp 106-107 °C; <sup>1</sup>H NMR (CDCl<sub>3</sub>, 300 MHz) δ 7.57-7.60 (m, 2H), 7.70-7.73 (m, 2H), 7.78-7.81 (d, *J* = 8.7 Hz, 1H), 8.31-8.35 (m, 1H); <sup>13</sup>C NMR (CDCl<sub>3</sub>, 300 MHz) δ 124.96, 128.71, 128.83, 129.50, 129.94, 133.45, 134.03, 134.61, 137.10, 197.72; IR (CHCl<sub>3</sub>) 1680 cm<sup>-1</sup>; HRMS *m/z* 281.9545 (calcd for C<sub>11</sub>H<sub>7</sub>IO, 281.9542).

**General Procedure for the Palladium-Catalyzed Synthesis of Fluoren-9-ones.**

The 2-iodobenzaldehyde (0.30 mmol), the 2-(trimethylsilyl)aryl triflate (1.50 mmol), CsF (1.50 mmol), Pd(dba)<sub>2</sub> (0.015 mmol), P(*o*-tolyl)<sub>3</sub> (0.015 mmol), 2 mL of toluene, and 2 mL of MeCN were placed in a 4 dram vial and the vial was sealed. The reaction mixture was stirred first at room temperature for 1 min and then heated to 110 °C for 12 h. The mixture was allowed to cool to room temperature (CAUTION: OPENING THE VIAL AT HIGH TEMPERATURE CAN BE DANGEROUS!), diluted with diethyl ether, washed with brine, dried over anhydrous MgSO<sub>4</sub>, and concentrated under reduced pressure. The product was isolated by flash chromatography on silica gel.

Compounds **3**,<sup>7</sup> **13**,<sup>8</sup> **18**,<sup>9</sup> **20**,<sup>9</sup> and **21**<sup>9</sup> were obtained after flash chromatography, and their spectral properties are identical with these previously reported.

**1-Fluoro-9H-fluoren-9-one (6).** The indicated compound was obtained as a yellow solid in an 82% yield. The reaction mixture was chromatographed using 10:1 hexane/EtOAc: mp 117-119 °C; <sup>1</sup>H NMR (CDCl<sub>3</sub>, 300 MHz) δ 6.89-6.95 (t, *J* = 8.4 Hz, 1H), 7.29-7.35 (m, 2H), 7.43-7.53 (m, 3H), 7.65-7.67 (d, *J* = 7.5 Hz, 1H); <sup>13</sup>C NMR (CDCl<sub>3</sub>, 75 MHz) δ 116.61, 116.65, 117.59, 117.87, 120.12, 120.29, 120.88, 124.69, 129.90, 134.19, 134.86, 137.23, 137.34, 143.59, 143.63, 146.56, 146.61, 157.79, 161.29,

190.36 (extra peaks due to F splitting); IR (CHCl<sub>3</sub>) 2923, 1716, 1600, 1471 cm<sup>-1</sup>; HRMS *m/z* 198.0485 (calcd for C<sub>13</sub>H<sub>7</sub>FO, 198.0481).

**9H-Fluoreno[2,3-*d*][1,3]dioxol-9-one (8).** The reaction mixture was chromatographed using 10:1 hexane/EtOAc and the indicated compound was obtained as a yellow solid in a 56% yield: mp 145-147 °C; <sup>1</sup>H NMR (CDCl<sub>3</sub>, 400 MHz) δ 6.05 (s, 2H), 6.95 (s, 1H), 7.09 (s, 1H), 7.18-7.22 (m, 1H), 7.31-7.33 (d, *J* = 7.6 Hz, 1H), 7.39-7.43 (m, 1H), 7.53-7.55 (d, *J* = 7.6 Hz, 1H); <sup>13</sup>C NMR (CDCl<sub>3</sub>, 100 MHz) δ 101.76, 102.27, 105.18, 119.31, 123.81, 128.39, 128.71, 134.38, 134.76, 141.74, 143.67, 148.50, 153.37, 192.45; IR (CHCl<sub>3</sub>) 1709, 1593, 1477, 1458 cm<sup>-1</sup>; HRMS *m/z* 224.0476 (calcd for C<sub>14</sub>H<sub>8</sub>O<sub>3</sub>, 224.0473).

**10H-Fluoreno[1,2-*d*][1,3]dioxol-10-one (10).** The reaction mixture was chromatographed using 20:1 hexane/EtOAc and the indicated compound was obtained as a yellow solid in a 72% yield (from the aryl iodide) or 50 % (from the aryl bromide): mp 161-163 °C; <sup>1</sup>H NMR (CDCl<sub>3</sub>, 400 MHz) δ 6.12 (s, 2H), 6.81 (d, *J* = 7.6 Hz, 1H), 6.97 (d, *J* = 7.6 Hz, 1H), 7.24-7.26 (m, 1H), 7.45-7.46 (m, 2H), 7.65 (d, *J* = 7.6 Hz, 1H); <sup>13</sup>C NMR (CDCl<sub>3</sub>, 100 MHz) δ 103.05, 111.96, 113.60, 115.44, 119.94, 124.41, 128.21, 134.24, 134.62, 136.89, 144.60, 145.00, 150.44, 190.92; IR (CHCl<sub>3</sub>) 1710, 1468, 1250 cm<sup>-1</sup>; HRMS *m/z* 224.0478 (calcd for C<sub>14</sub>H<sub>8</sub>O<sub>3</sub>, 224.0473).

**2,3-Dimethyl-9H-fluoren-9-one (15).** The reaction mixture was chromatographed using 20:1 hexane/EtOAc and the indicated compound was obtained as a yellow solid in a 71% yield: mp 88-89 °C; <sup>1</sup>H NMR (CDCl<sub>3</sub>, 400 MHz) δ 7.22-7.25 (m, 2H), 7.41-7.43 (m, 3H), 7.59 (d, *J* = 7.6 Hz, 1H); <sup>13</sup>C NMR (CDCl<sub>3</sub>, 100 MHz) δ 19.95, 20.77, 119.84, 121.82, 124.11, 125.59, 128.55, 132.34, 134.41, 134.64, 137.62, 142.55,

144.19, 144.65, 194.12 IR (CHCl<sub>3</sub>) 2922, 1707, 1601, 1452 cm<sup>-1</sup>; HRMS *m/z* 208.0891 (calcd for C<sub>15</sub>H<sub>12</sub>O, 208.0888).

**1-Fluoro-6,7-dimethyl-9H-fluoren-9-one (16).** The reaction mixture was chromatographed using 20:1 hexane/EtOAc and the indicated compound was obtained as a yellow solid in a 73% yield: mp 165-167 °C; <sup>1</sup>H NMR (CDCl<sub>3</sub>, 400 MHz) δ 2.24 (s, 3H), 2.29 (s, 3H), 6.82-6.87 (t, *J* = 8.8 Hz, 1H), 7.17 (d, *J* = 7.6 Hz, 1H), 7.21 (s, 1H), 7.36-7.39 (m, 2H); <sup>13</sup>C NMR (CDCl<sub>3</sub>, 100 MHz) δ 19.99, 20.73, 115.92, 115.95, 116.88, 117.09, 120.20, 120.32, 122.07, 125.60, 132.10, 136.70, 136.78, 138.39, 141.48, 141.51, 144.24, 146.62, 146.66, 157.91, 160.52, 190.35 (extra peaks are due to F-splitting); IR (CHCl<sub>3</sub>) 2920, 1713, 1618, 1454 cm<sup>-1</sup>; HRMS *m/z* 226.0798 (calcd for C<sub>15</sub>H<sub>11</sub>FO, 226.0794).

### References

- (1) Bridges, A. J.; Lee, A.; Maduakor, E. C.; Schwartz, C. E. *Tetrahedron Lett.* **1992**, 33, 7499.
- (2) Yoshida, H.; Sugiura, S.; Kunai, A. *Org. Lett.* **2002**, 4, 2767.
- (3) Peña, D.; Pérez, D.; Guitián, E.; Castedo, L. *J. Am. Chem. Soc.* **1999**, 121, 5827.
- (4) Yoshikawa, E.; Radhakrishnan, K. V.; Yamamoto, Y. *J. Am. Chem. Soc.* **2000**, 123, 7280.
- (5) Bogucki, D. E.; Charlton, J. L. *J. Org. Chem.* **1995**, 60, 588.
- (6) Mattson, R. J.; Sloan, C. P.; Lockhart, C. C.; Catt, J. D.; Gao, Q.; Huang, S. *J. Org. Chem.* **1999**, 64, 8004.
- (7) This compound was identified by comparing the <sup>1</sup>H and <sup>13</sup>C NMR spectra and melting point with an authentic sample obtained from Aldrich Chemical Co., Inc.

- (8) Campo M. A.; Larock, R. C. *Org. Lett.* **2000**, 2, 3675.
- (9) Campo M. A.; Larock, R. C. *J. Org. Chem.* **2002**, 67, 5616.

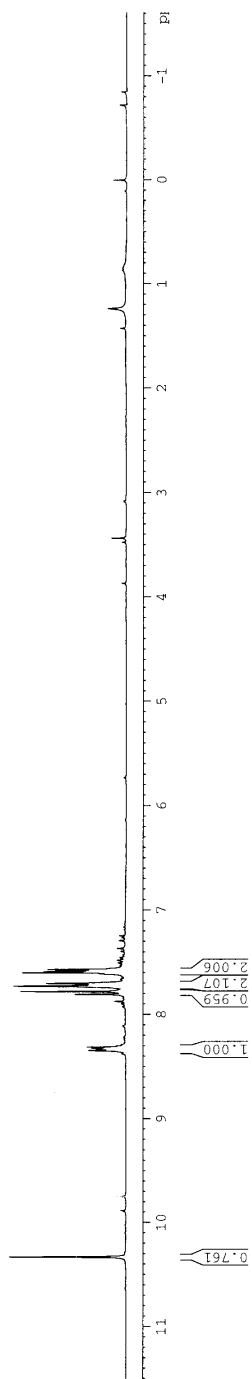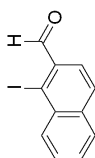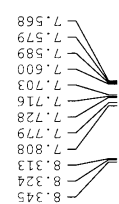

10.332

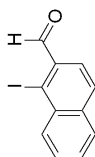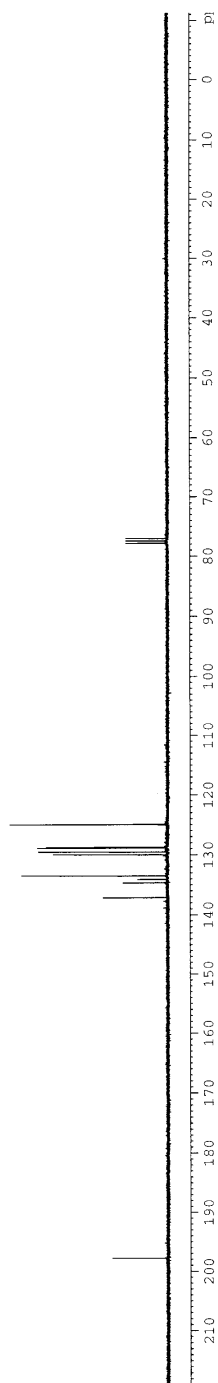

| Year | Average number of children per woman |
|------|--------------------------------------|
| 1960 | 2.10                                 |
| 1965 | 2.05                                 |
| 1970 | 2.00                                 |
| 1975 | 1.95                                 |
| 1980 | 1.90                                 |
| 1985 | 1.85                                 |
| 1990 | 1.80                                 |
| 1995 | 1.75                                 |
| 2000 | 1.70                                 |
| 2005 | 1.65                                 |
| 2010 | 1.60                                 |

197.718

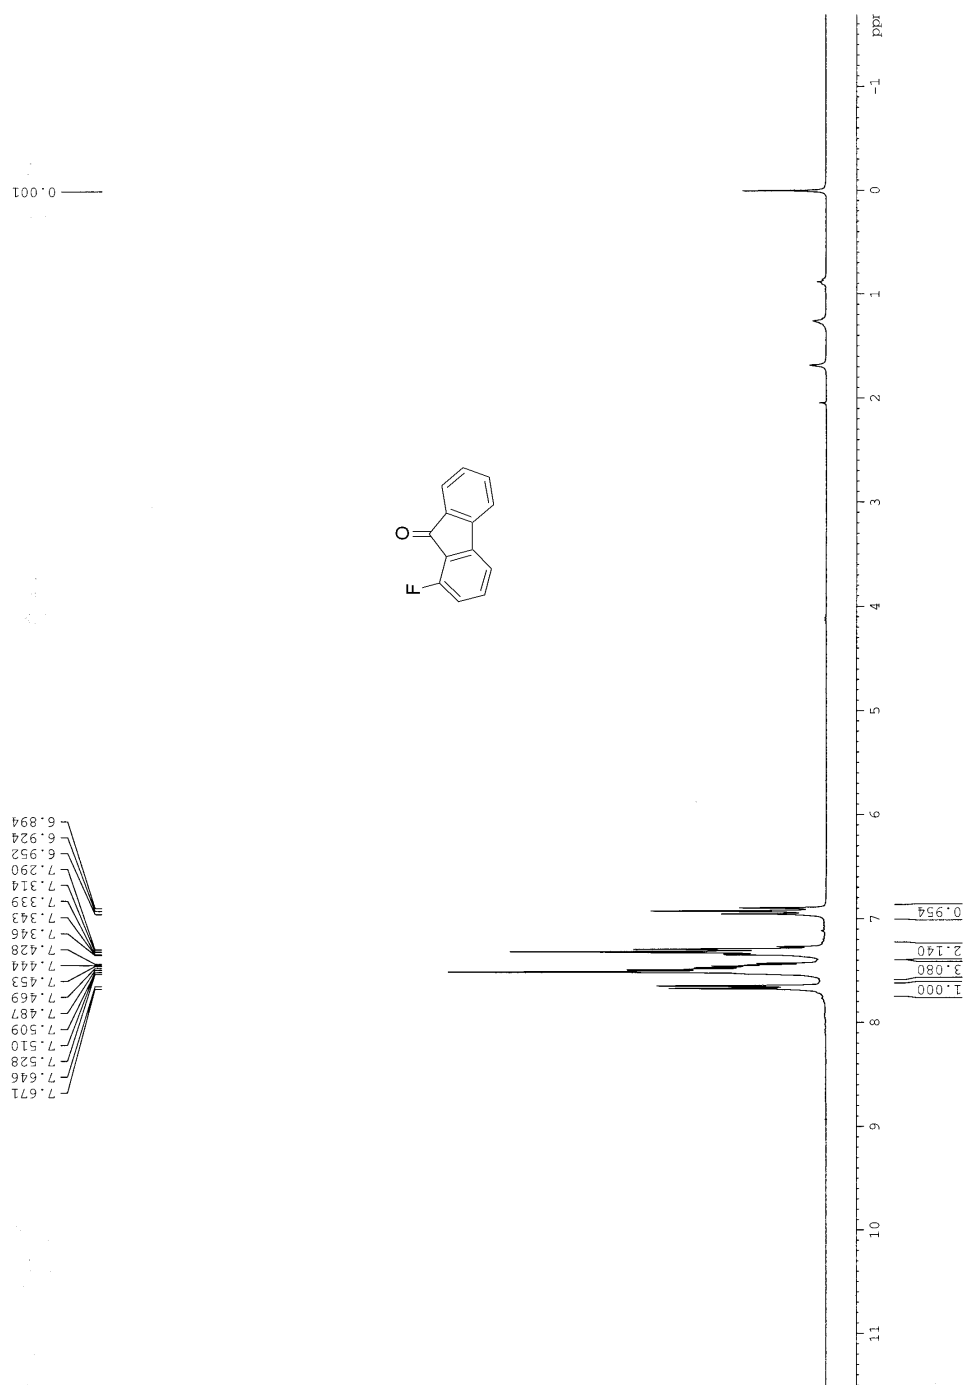



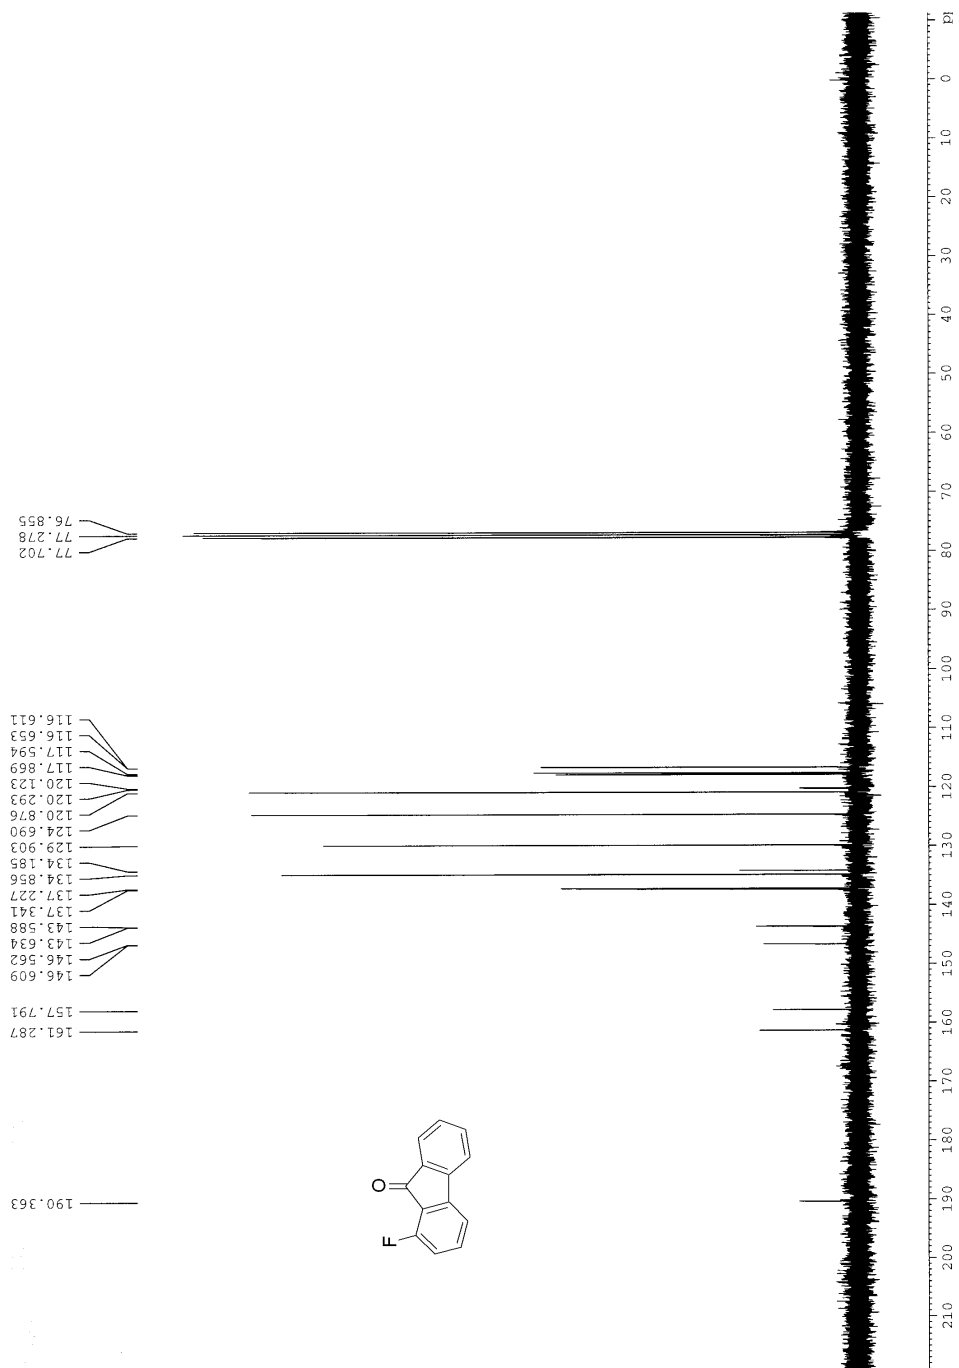

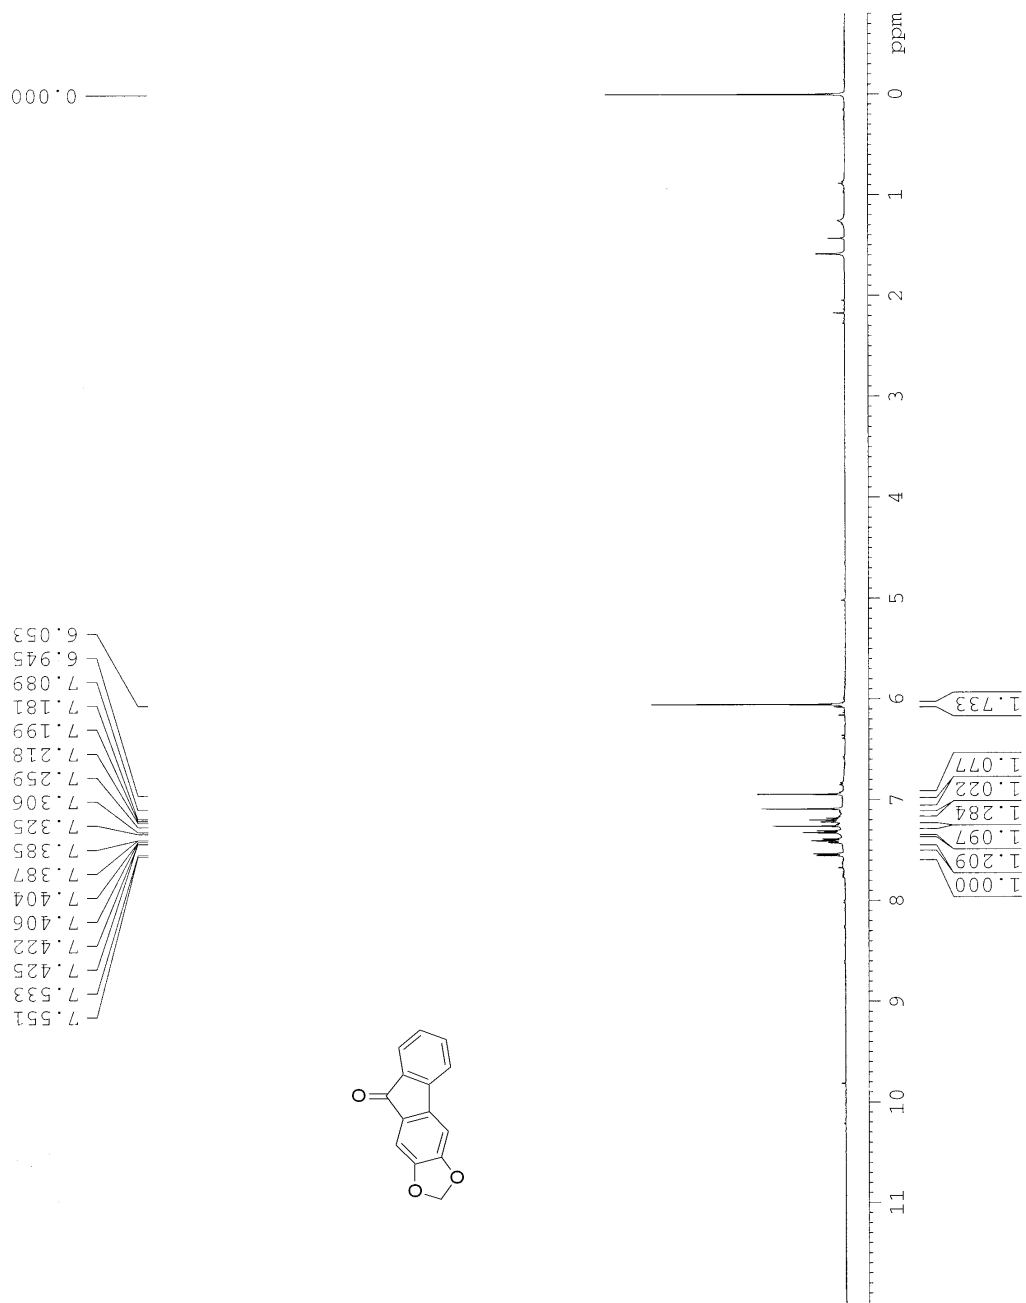

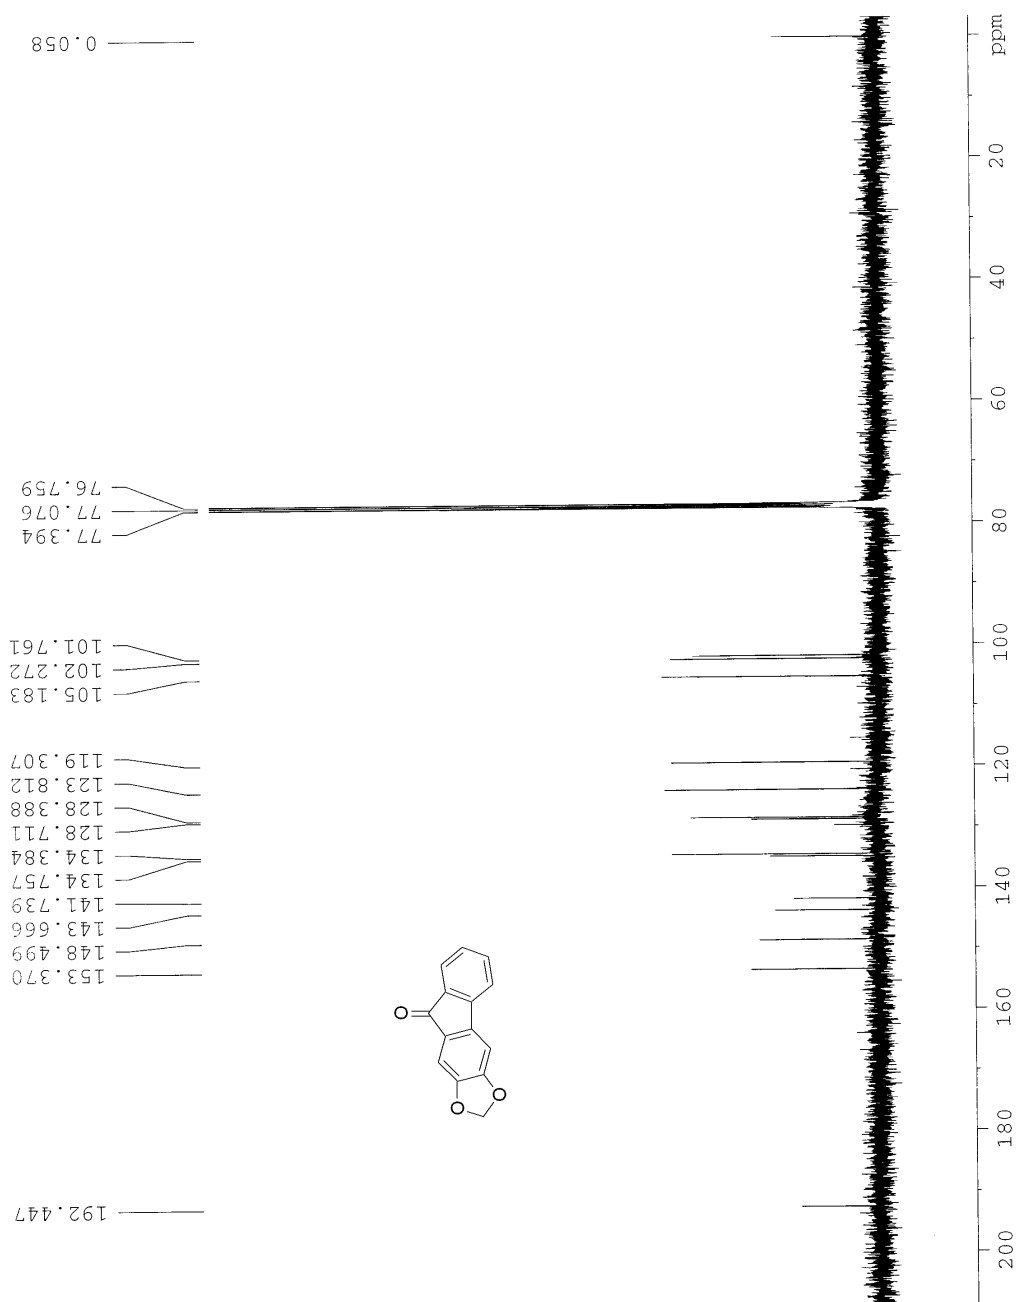

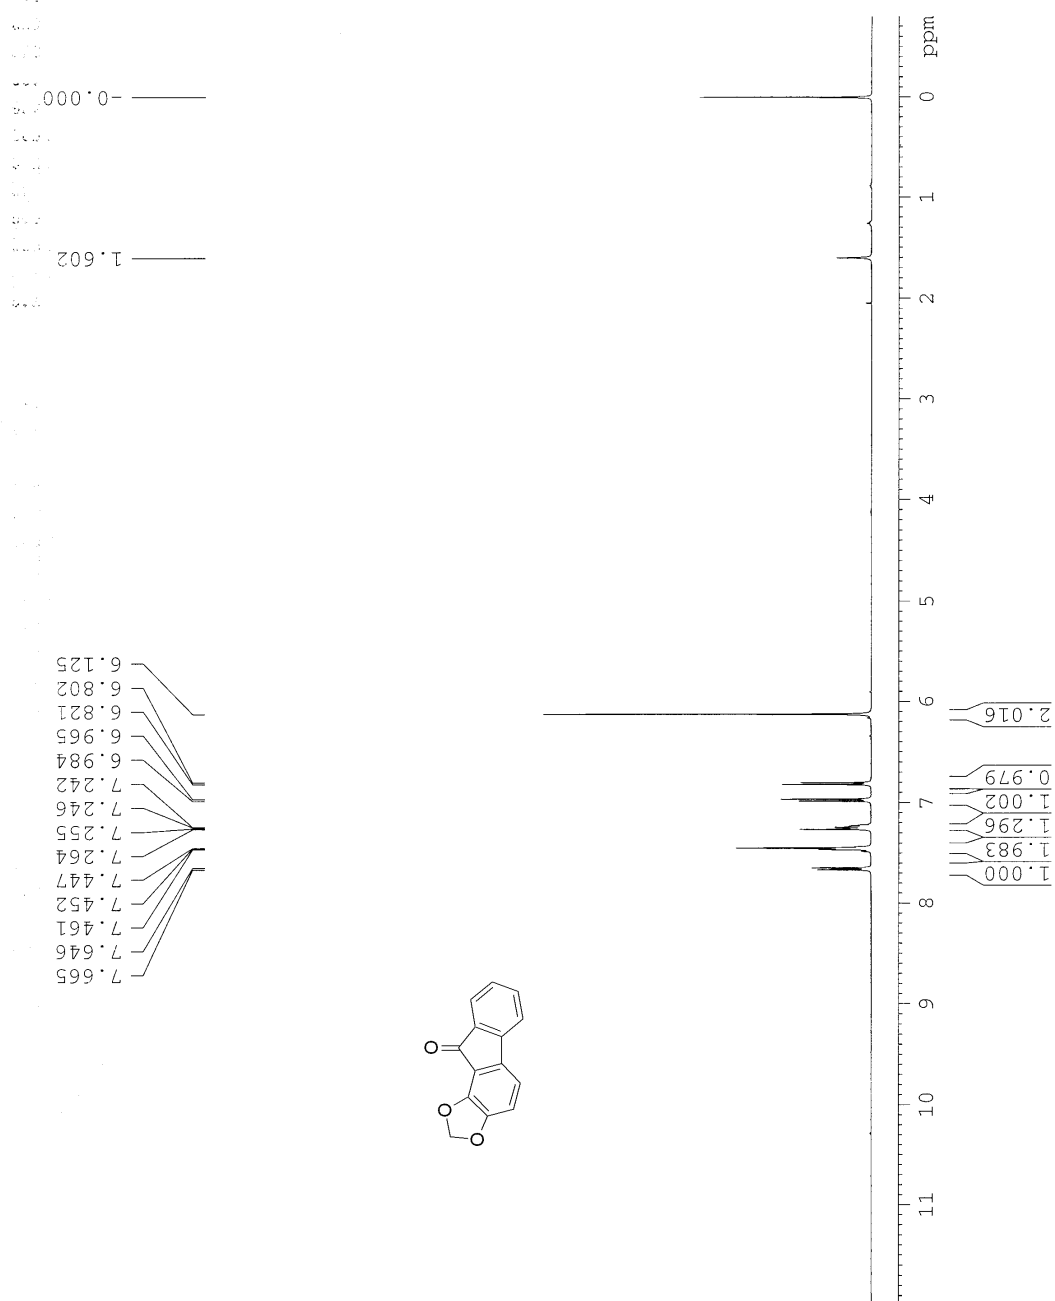

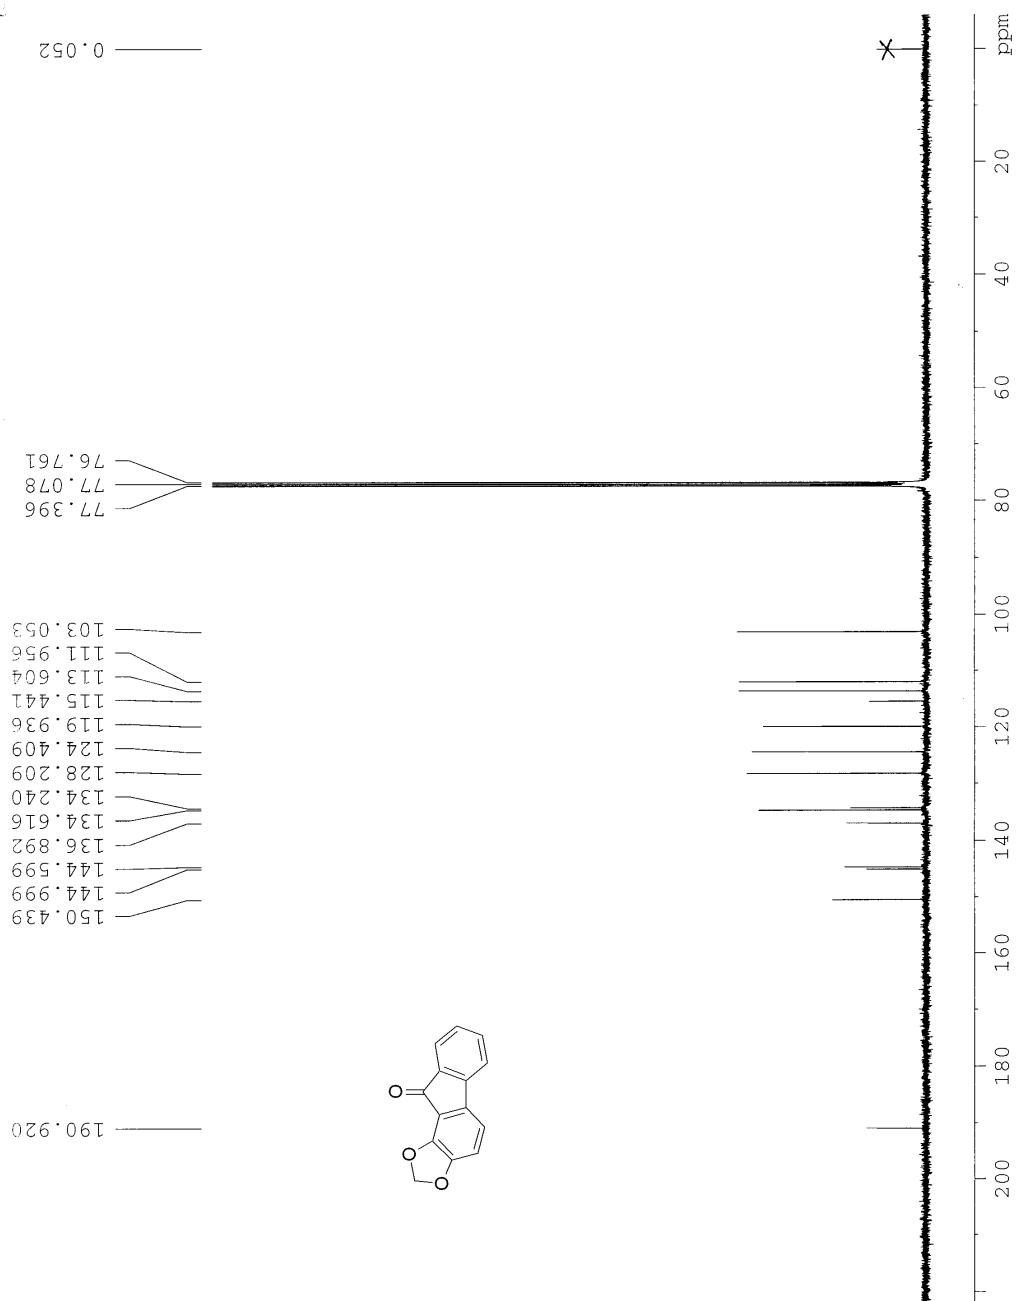

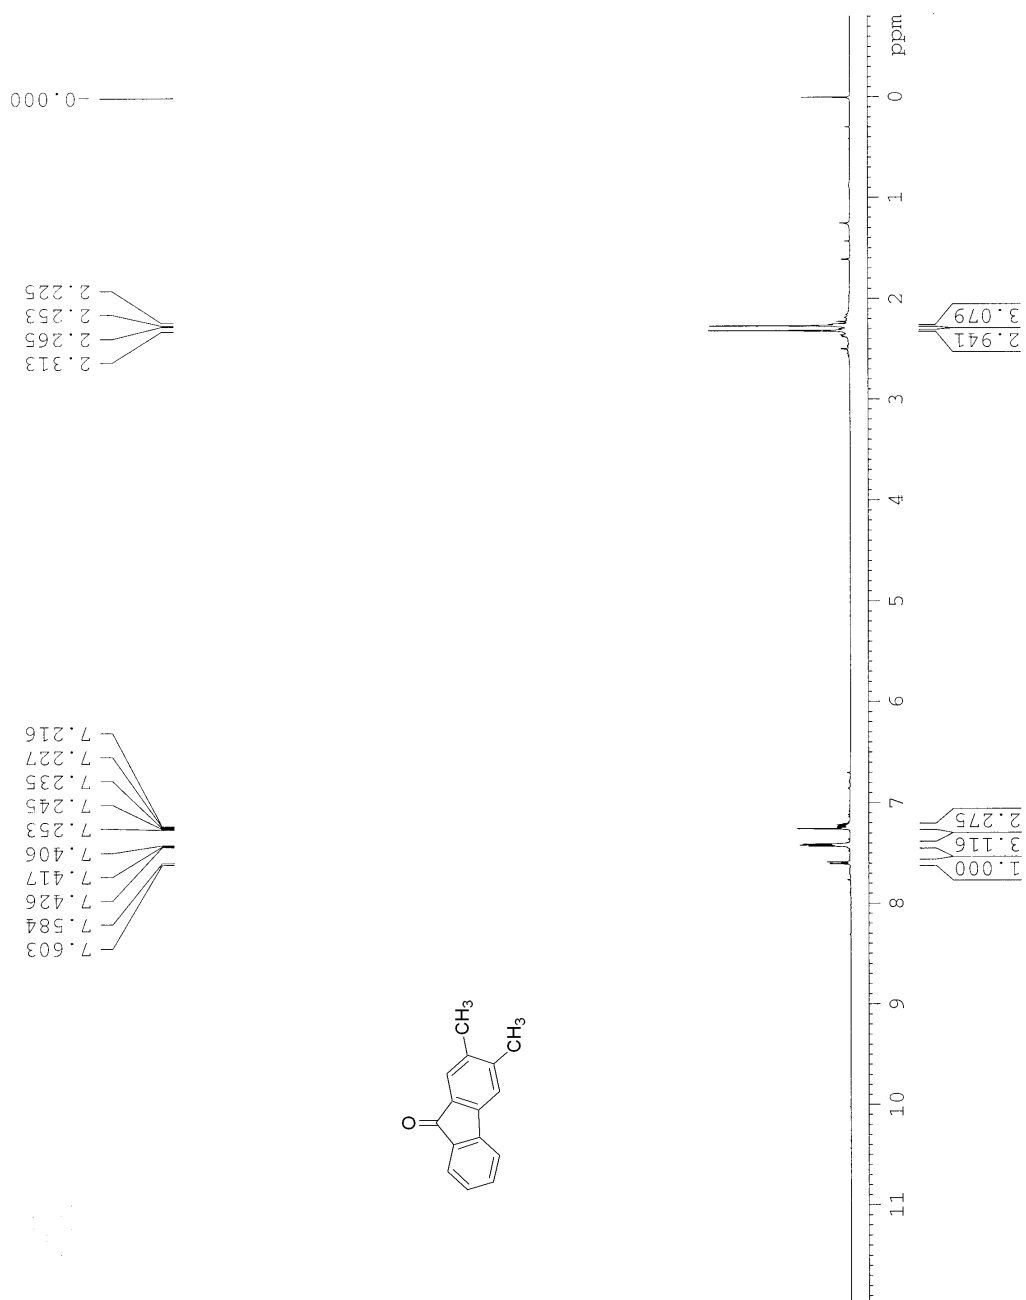

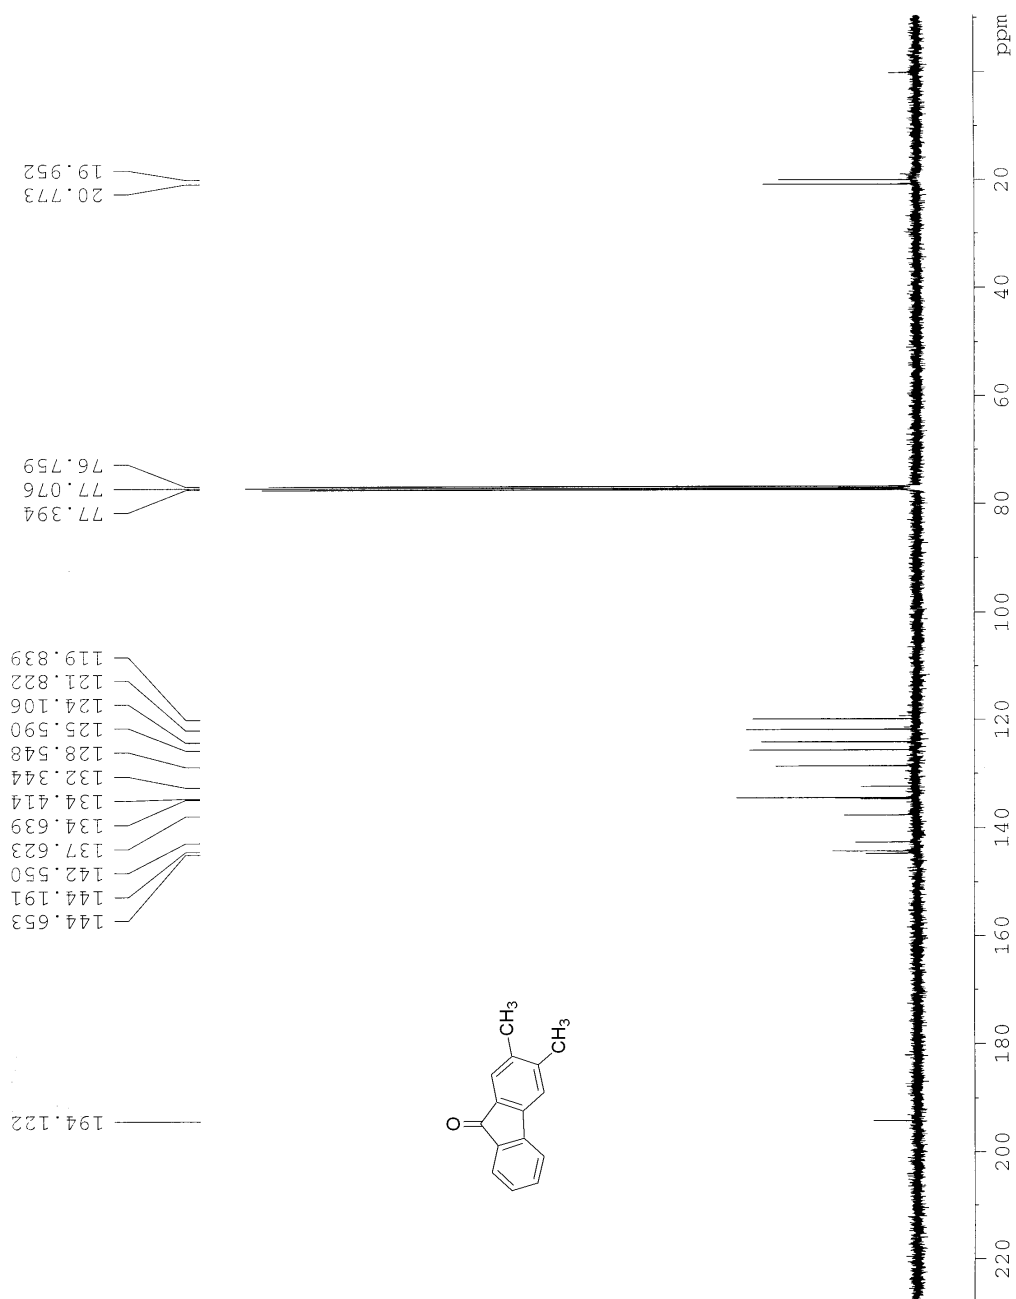

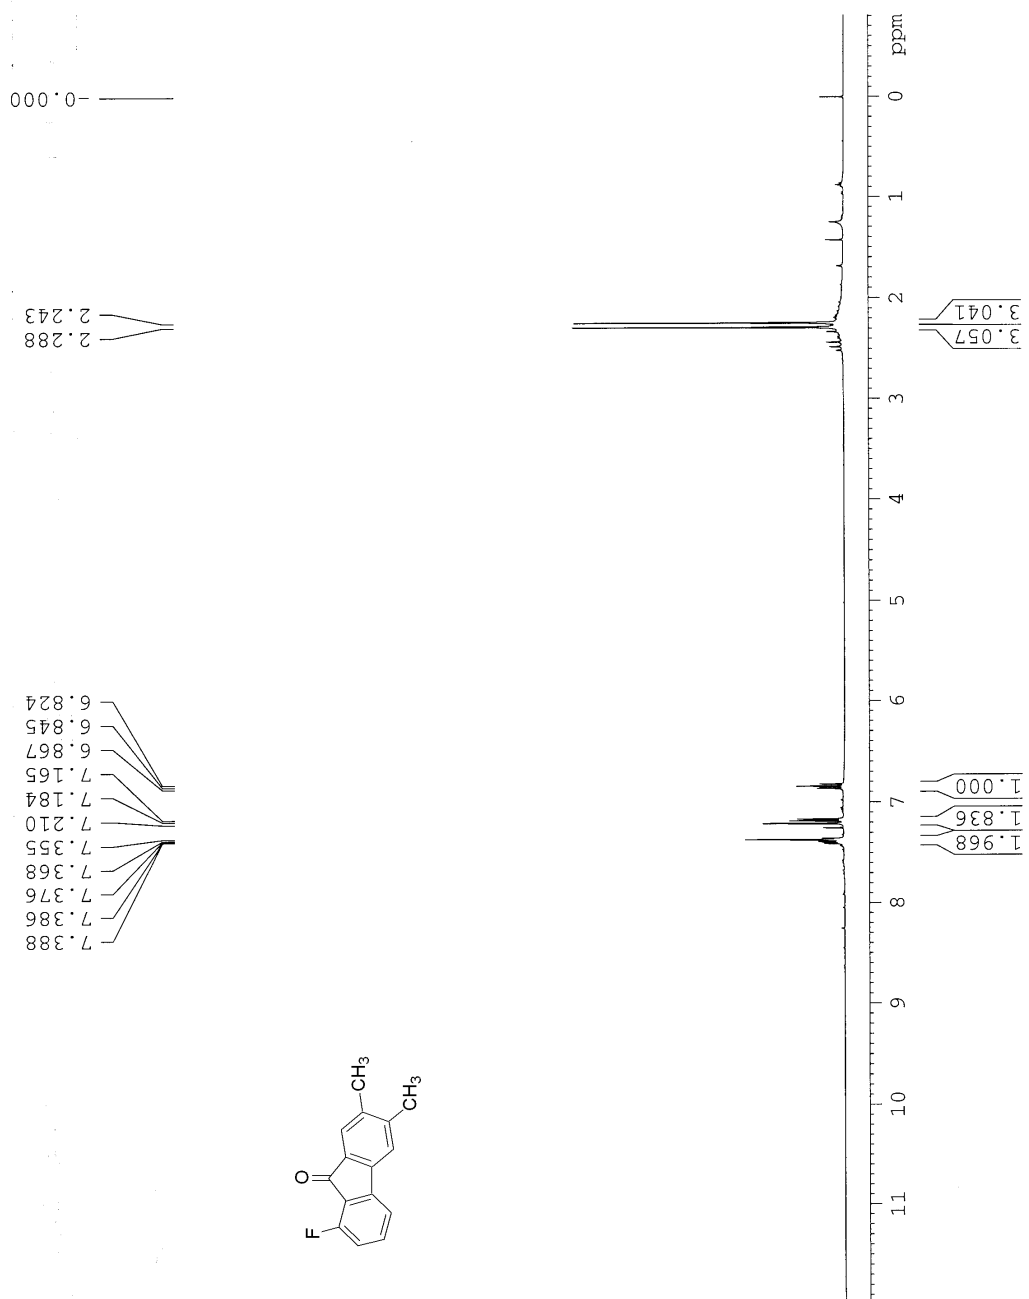



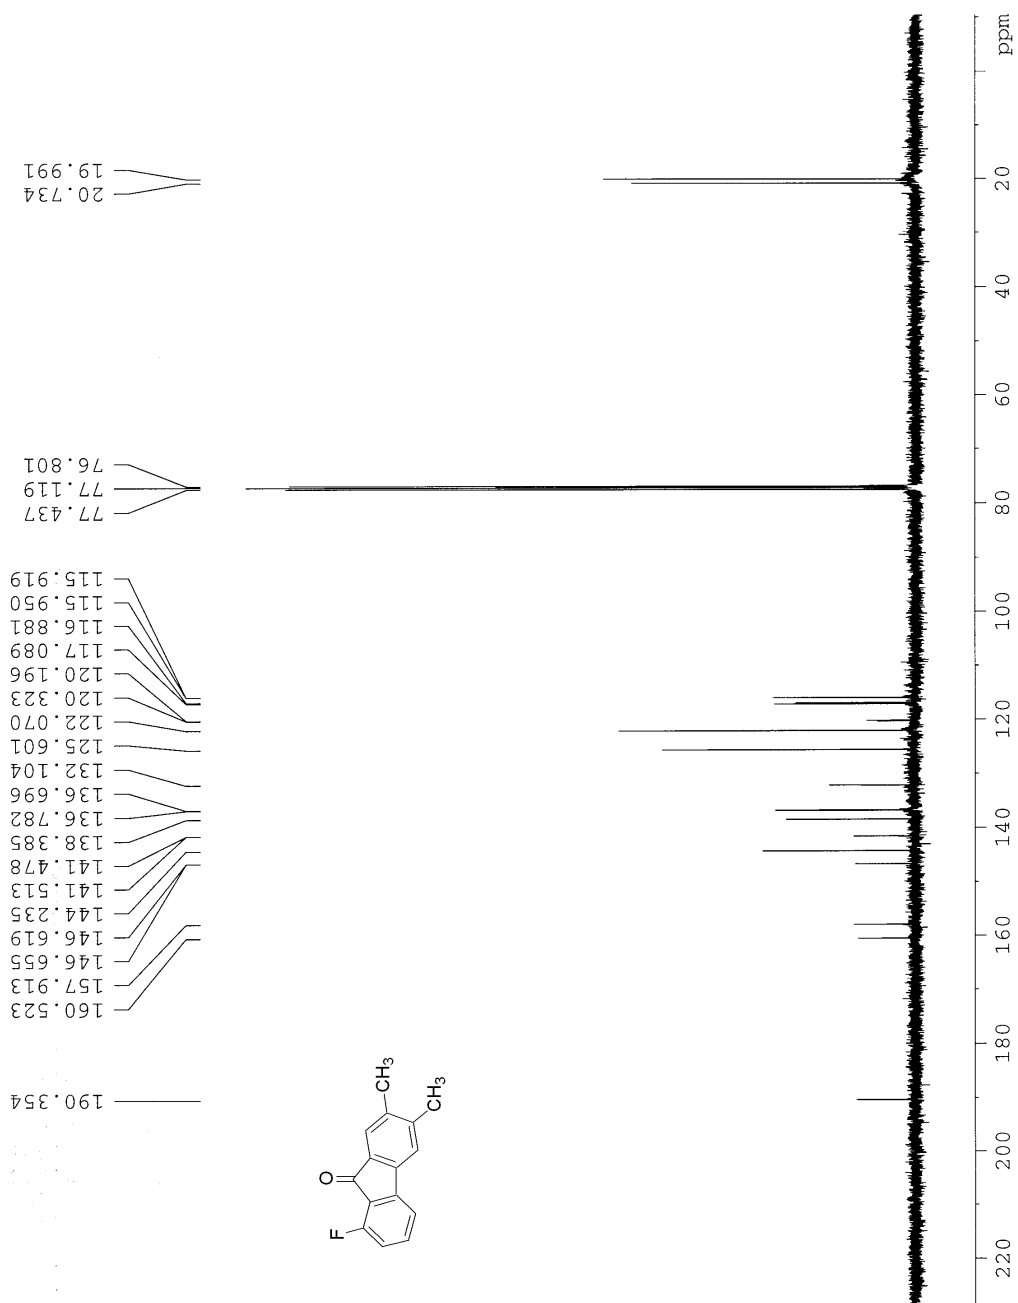

Supplement: Supplementary file 1 [file 5108161]
